# Supplementary material for: Förderung der psychischen Gesundheit von geflüchteten Menschen
Source: Springer Nature journal article supplement (doi:10.1007/s11553-021-00899-w), 2021-09-06
Supplement: MOESM1 [file 19636288]

Tab. 3 Exemplarische Zitate zu der Teilnahme an „Mind-Spring“ (MS)

| Kategorie                                          | Zitat                                                                                                                                                                                                                                                                                                                                                                                                                                                                                                                                                                    |
|----------------------------------------------------|--------------------------------------------------------------------------------------------------------------------------------------------------------------------------------------------------------------------------------------------------------------------------------------------------------------------------------------------------------------------------------------------------------------------------------------------------------------------------------------------------------------------------------------------------------------------------|
| <b>Individuelle Faktoren</b>                       |                                                                                                                                                                                                                                                                                                                                                                                                                                                                                                                                                                          |
| Bedarfe                                            | [1] Ich kenne viele Leute, die kommen zu mir, sagen: ‚[...] Fast jeden Tag habe ich Kopfschmerzen. Und ich gehe zum Arzt. Was Arzt gibt mir, es funktioniert nicht mehr. [...]‘ Eigentlich kommen die Probleme aus PSYCHischen Problemen. Und [...] die haben Depression oder die sind unter Stress und die haben keine Information. (PT1)                                                                                                                                                                                                                               |
| Nutzenabwägungen                                   | [2] wenn die nicht hilfreich ist, dann es ist so: Die Teilnehmer kommen nur erstmal oder zwei Mal, dann für dritte Mal, die kommen nicht mehr. Aber wenn die Interesse dran findet, dann die würden immer teilnehmen und immer pünktlich kommen. (PT1)<br>[3] mit der Hoffnung, ich würde einfach gute Ergebnisse sehen, BESONDERS, wo man uns beschrieben hat, dass da ein Arzt aus dem AUSland kommt, und... Weil ich (.) MÖCHTE ja gerne, dass ich dann, dass mein Gedächtnis besser wird, und dass ich LERNE, besser lernen kann, und arbeite, arbeiten kann... (T3) |
| <b>Soziale Faktoren</b>                            |                                                                                                                                                                                                                                                                                                                                                                                                                                                                                                                                                                          |
| Genderbezogene Rollenerwartungen                   | [4] nicht einfach, arabische Männer sprechen von Trauer oder Verlust oder Stress... [...] Nicht einfach für Mann, weinen. (PT2)                                                                                                                                                                                                                                                                                                                                                                                                                                          |
| Sorge vor mangelnder Toleranz oder Stigmatisierung | [5] Da war ein junger Mann, der hat aufgehört, hat's abgebrochen [...]. Vielleicht sind das [...] die Themen, die Sex oder Alkohol oder Rauchen betreffen [...]. Er hat selber geraucht und vielleicht ist er anderer Überzeugung und wollte nicht hier Infos von sich preisgeben. (T1)                                                                                                                                                                                                                                                                                  |
| <b>Organisationsbezogene Faktoren</b>              |                                                                                                                                                                                                                                                                                                                                                                                                                                                                                                                                                                          |
| Räumliche und zeitliche Organisation               | [6] Pforzheim ist sehr weit. Und mit Baby und mein Kind... Nein, ich gehe nicht... Nein. Das war neben bei uns... Wenn hattet ein gute Zeit, ich WOLLTE gehen (NT1)<br>[7] Also es gibt schon einige, die Probleme hatten und konnten nicht daran teilnehmen, weil die UHRzeit nicht passend war. Zum Beispiel in der betroffenen Zeit mussten sie zum Deutschkurs und konnten daher NICHT zu dieser Sitzung kommen. (T4)                                                                                                                                                |
| Informations- und Zugangsweg                       | [8] Eine Angestellte von [MS] war bei mir zu Hause und hat einfach meine Situation gesehen, so, und da, hat mich dann gebeten, daran teilzunehmen. (T3)                                                                                                                                                                                                                                                                                                                                                                                                                  |
| <b>Angebotsbezogene Faktoren</b>                   |                                                                                                                                                                                                                                                                                                                                                                                                                                                                                                                                                                          |
| Gruppenangebot                                     | [9] also die [anderen Teilnehmenden] haben mir zugehört, sie haben mich auch verstanden, und die                                                                                                                                                                                                                                                                                                                                                                                                                                                                         |

|                                       |                                                                                                                                                                                                                                                                                                                                                                                                                                                 |
|---------------------------------------|-------------------------------------------------------------------------------------------------------------------------------------------------------------------------------------------------------------------------------------------------------------------------------------------------------------------------------------------------------------------------------------------------------------------------------------------------|
|                                       | <p>haben immer wieder auf mich ZUgesprochen, dass ich mir keine großen Sorgen mache, ich soll nicht traurig sein (T4)</p> <p>[10] Zwar alle waren aus Syrien, aber aus unterschiedlichen Ortschaften. Und [...] die haben auch andere Kultur, womöglich andere Sitten... Das war auch ein Unterschied, so, wie einer der aus Syrien [kommt] und einer aus Deutschland. (T2)</p>                                                                 |
| Trainer*innentandem                   | <p>[11] die Aufklärung beruhte auf Gegenseitigkeit. [...] Dass man sieht, dass wir auch mal so unser Eigenes haben, [...] Und den Wert dessen. Und auf der anderen Seite bekamen wir auch erklärt, die offenen Fragen, die wir mit kritischem Auge anfangs gesehen haben. Dass man gesagt hat: Ne, das gehört hier einfach dazu, zu der Gesellschaft, zu den Gebräuchen hier, zu der Lebensart. (T1)</p>                                        |
| Mangelnde Übertragbarkeit der Inhalte | <p>[12] (Zögernd, dann lachend) Äh, also, die waren schon ganz gute Punkte. Also die geschildert wurde und dass wir auch darauf achten sollten. Aber ich habe keine davon einfach mal PROBIERT. (leises Gelächter) Weil ich ja eher alleine bin, und spazieren gehen, habe ich auch nicht gemacht, weil ich ja ALLEINE bin. (T5)</p>                                                                                                            |
| Konflikte Rollenverständnis           | <p>[13] Also wir wollten schon dann immer wieder [...] DASS der afghanische Mann einiges MITteilt, an Frau [Nachname der Co-Trainerin], WAS für Probleme wir hatten, aber der hat sich ja immer verweigert und immer gesagt: ‚Ja, das ist nur ein Kurs, ein Beratungsgespräch wegen Stress und das hat mit Ihrer Probleme GAR nichts zu tun und jetzt ist kein richtiger Zeit um solche..., um über solche Sachen sprechen zu können!. (T5)</p> |
